# Supplementary material for: Genome-wide identification of the PLD gene family and its response to multiple abiotic stresses in soybean (Glycine max)
Source: Research Square preprint supplement (doi:10.21203/rs.3.rs-7469438/v1), 2025-09-25
Supplement: Supplementary file 1 [file 2ac513c9d91a79732e151004.xlsx]

## Sheet: S1
Table S1 The characteristics of members of Arabidopsis PLD genes family.
Gene name	Sequence number	Protein Accession	Amino acid number	Genetic subfamily
AtPLDα1	At3g15730	BAB02304	810	C2
AtPLDα2	At1g52570	AAD55607	810	C2
AtPLDα3	At5g25370	NP-197919	820	C2
AtPLDε1	At1g55180	AAG51567	762	C2
AtPLDβ1	At2g42010	AAB63542	1083	C2
AtPLDβ2	At4g00240	AAF02803	927	C2
AtPLDγ1	At4g11850	CAB78228	858	C2
AtPLDγ2	At4g11830	CAB78226	856	C2
AtPLDγ3	At4g11840	CAB78227	866	C2
AtPLDδ1	At4g35790	CAB81488	868	C2
AtPLDζ1	At3g16790	BAA95772	1096	PX/PH
AtPLDζ2	At3g05630	AAF26134	1046	PX/PH

## Sheet: S2
Table S2 The characteristics of members of rice PLD genes family.
Sequence number	Protein Accession	Amino acid number	Genetic subfamily	Gene name
OsPLDα1	Os01g0172400	Q43007	812	C2
OsPLDα2	Os05g0171000	AAU44332	824	C2
OsPLDα3	Os06g0604400	P93844	817	C2
OsPLDα4	Os06g0604200	AAF78754	832	C2
OsPLDα5	Os06g0604300	AAF78755	842	C2
OsPLDα6	Os03g0391400	ABF96369	851	C2
OsPLDα7	Os08g0401800	BAC98682	832	C2
OsPLDα8	Os09g0421300	AAL78822	817	C2
OsPLDβ1	Os10g0524400	BAF27022	1046	C2
OsPLDβ2	Os03g0119100	ABF93676	904	C2
OsPLDδ1	Os09g0543100	BAF25740	854	C2
OsPLDδ2	Os03g0840800	AAF78756	849	C2
OsPLDδ3	Os07g0260400	BAF21238	838	C2
OsPLDκ1	Os02g0120200	BAF07592	910	C2
OsPLDζ1	Os05g0358700	AAT38042	1084	PX/PH
OsPLDζ2	Os01g0310100	BAC00694	1115	PX/PH
OsPLDφ1	Os06g0649900	BAD38104	512	SP

## Sheet: S3
Table S3 Segmentally duplicated GmPLD genes pairs.
Gene Name	Gene ID	Gene Name	Gene ID	Duplication Type
GmPLDα1	Glyma.08g211700	GmPLDα4	Glyma.06g068601	Segmental duplication
GmPLDα2	Glyma.07g031100	GmPLDα4	Glyma.06g068600	Segmental duplication
GmPLDα6	Glyma.15g008500	GmPLDα4	Glyma.06g068602	Segmental duplication
GmPLDβ1	Glyma.02g093500	GmPLDβ2	Glyma.18g288600	Segmental duplication
GmPLDβ3	Glyma.03g018900	GmPLDβ4	Glyma.07g080400	Segmental duplication
GmPLDδ1	Glyma.11g081500	GmPLDδ2	Glyma.01g162102	Segmental duplication
GmPLDδ1	Glyma.11g081500	GmPLDδ4	Glyma.06g020500	Segmental duplication
GmPLDδ1	Glyma.11g081500	GmPLDδ5	Glyma.04g020400	Segmental duplication
GmPLDδ2	Glyma.01g162101	GmPLDδ4	Glyma.06g020500	Segmental duplication
GmPLDδ2	Glyma.01g162100	GmPLDδ5	Glyma.04g020400	Segmental duplication
GmPLDδ3	Glyma.05g168300	GmPLDδ6	Glyma.08g126700	Segmental duplication
GmPLDδ4	Glyma.06g020500	GmPLDδ5	Glyma.04g020400	Segmental duplication
GmPLDφ1	Glyma.04g060900	GmPLDφ2	Glyma.06g061500	Segmental duplication

## Sheet: S4
Table S4 Pan-genome distribution of GmPLD genes.
Gene name	W82	W05	ZH13	SoyW01	SoyW02	SoyW03	SoyL01	SoyL02	SoyL03	SoyL04	SoyL05	SoyL06	SoyL07	SoyL08	SoyL09	SoyC01	SoyC02	SoyC03	SoyC04	SoyC05	SoyC06	SoyC07	SoyC08	SoyC09	SoyC10	SoyC11	SoyC12	SoyC13	SoyC14
GmPLDα1	Glyma.08g211700	Glyso.08g021201.1	SoyZH13_08G201800	SoyW01_08G206500	SoyW02_08G193900	SoyW03_08G209200	SoyL01_08G197700	SoyL02_08G195900	SoyL03_08G251400	SoyL04_08G206900	SoyL05_08G195000	SoyL06_08G209000	SoyL07_08G207500	SoyL08_08G207300	SoyL09_08G203100	SoyC01_08G197500	SoyC02_08G193600	SoyC03_08G206100		SoyC05_08G207000	SoyC06_08G193400	SoyC07_08G194900	SoyC08_08G195900	SoyC09_08G194200	SoyC10_08G196300	SoyC11_08G194900	SoyC12_08G196000	SoyC13_08G207100	SoyC14_08G196400
GmPLDα2	Glyma.07g031100	Glyso.07g016753.1	SoyZH13_07G029900	SoyW01_07G030600	SoyW02_07G028100	SoyW03_07G031100	SoyL01_07G029200	SoyL02_07G028800	SoyL03_07G028800	SoyL04_07G032000	SoyL05_07G029300	SoyL06_07G028200	SoyL07_07G030600	SoyL08_07G030700	SoyL09_07G031000	SoyC01_07G028400	SoyC02_07G029100	SoyC03_07G030500	SoyC04_07G031200	SoyC05_07G030400	SoyC06_07G028500	SoyC07_07G028600	SoyC08_07G028600	SoyC09_07G028100	SoyC10_07G028800	SoyC11_07G028600	SoyC12_07G028400	SoyC13_07G030800	SoyC14_07G028600
GmPLDα3	Glyma.13g364900	Glyso.11g032854.1	SoyZH13_13G336600	SoyW01_13G357100	SoyW02_11G194900	SoyW03_13G362100		SoyL02_13G335000	SoyL03_13G335100	SoyL04_13G359700	SoyL05_13G335600	SoyL06_13G343800	SoyL07_13G354900	SoyL08_13G357100	SoyL09_13G348200	SoyC01_13G334200	SoyC02_13G336800	SoyC03_13G356800	SoyC04_13G352600	SoyC05_13G353400	SoyC06_13G332800	SoyC07_13G336600	SoyC08_13G334300	SoyC09_13G336200	SoyC10_13G333500	SoyC11_13G333400	SoyC12_13G336400	SoyC13_13G364000	SoyC14_13G334800
GmPLDα4	Glyma.06g068600	Glyso.06g013963.1	SoyZH13_06G064100	SoyW01_06G064700	SoyW03_06G064400	SoyW03_06G064400	SoyL01_06G062300	SoyL02_06G060800	SoyL03_06G064300	SoyL04_06G064500	SoyL05_06G063800	SoyL06_06G062000	SoyL07_06G064300	SoyL08_06G064400	SoyL09_06G064500	SoyC01_06G060600	SoyC02_06G061500	SoyC03_06G065500	SoyC04_06G064100	SoyC05_06G065300	SoyC06_06G062100	SoyC07_06G061300	SoyC08_06G062500	SoyC09_06G061500	SoyC10_06G060900	SoyC11_06G061200	SoyC12_06G063400	SoyC13_06G064400	SoyC14_06G061700
GmPLDα5	Glyma.06g068700	Glyso.06g013964.1	SoyZH13_06G064200	SoyW01_06G064800		SoyW03_06G064500				SoyL04_06G064600			SoyL07_06G064400	SoyL08_06G064500	SoyL09_06G064600				SoyC04_06G064200	SoyC05_06G065400			SoyC08_06G062600					SoyC13_06G064500
GmPLDα6	Glyma.15g008500
GmPLDβ1	Glyma.18g288600	Glyso.18g049908.1	SoyZH13_18G256800	SoyW01_18G309000	SoyW02_18G286000	SoyW03_18G303200	SoyL01_18G287300	SoyL02_18G284400	SoyL03_18G293300	SoyL04_18G308500	SoyL05_18G289200	SoyL06_18G294500	SoyL07_18G305900	SoyL08_18G312600	SoyL09_18G300400	SoyC01_18G288700	SoyC02_18G288900	SoyC03_18G302500	SoyC04_18G296400	SoyC05_18G307000	SoyC06_18G291600	SoyC07_18G286900	SoyC08_18G286100	SoyC09_18G290100	SoyC10_18G287300	SoyC11_18G308700	SoyC12_18G287700	SoyC13_18G304100	SoyC14_18G287300
GmPLDβ2	Glyma.02g093500	Glyso.02g003430.2	SoyZH13_02G086800	SoyW01_02G089700	SoyW02_02G083400	SoyW03_02G088900		SoyL02_02G082800	SoyL03_02G084100	SoyL04_02G090900	SoyL05_02G083200	SoyL06_02G083700	SoyL07_02G091200	SoyL08_02G091200	SoyL09_02G090500	SoyC01_02G083600	SoyC02_02G084500	SoyC03_02G090100	SoyC04_02G089400	SoyC05_02G091100	SoyC06_02G086100	SoyC07_02G083600	SoyC08_02G084800	SoyC09_02G085700	SoyC10_02G082500	SoyC11_02G084500	SoyC12_02G083900	SoyC13_02G089300	SoyC14_02G084100
GmPLDβ3	Glyma.07g080400	Glyso.07g017232.1	SoyZH13_07G074900	SoyW01_07G077900	SoyW02_07G070800	SoyW03_07G079100	SoyL01_07G074400	SoyL02_07G072800	SoyL03_07G072300	SoyL04_07G080900	SoyL05_07G073900	SoyL06_07G073600	SoyL07_07G079500	SoyL08_07G078300	SoyL09_07G078600	SoyC01_07G074800	SoyC02_07G074800	SoyC03_07G078400	SoyC04_07G078500	SoyC05_07G077400	SoyC06_07G075600	SoyC07_07G074200	SoyC08_07G072800	SoyC09_07G073000	SoyC10_07G079000	SoyC11_07G076900	SoyC12_07G073200	SoyC13_07G078100
GmPLDβ4	Glyma.03g018900	Glyso.03g005812.1								SoyL04_03G018900
GmPLDγ1	Glyma.01g215100	Glyso.01g002235.2	SoyZH13_01G197500	SoyW01_01G234200	SoyW02_01G231700	SoyW03_01G234900	SoyL01_01G224900	SoyL01_18G287300	SoyL03_01G227200	SoyL04_01G233500	SoyL05_01G227400	SoyL06_01G228800	SoyL07_01G231800	SoyL08_01G231600	SoyL09_01G230300	SoyC01_01G226000	SoyC02_01G223300	SoyC03_01G231900	SoyC04_01G225400	SoyC05_01G230600	SoyC06_01G227600	SoyC07_01G225500	SoyC08_01G230400	SoyC09_01G227600	SoyC10_01G227100	SoyC11_01G227500	SoyC12_01G230100	SoyC13_01G232200
GmPLDδ1	Glyma.11g081500	Glyso.01g001714.1	SoyZH13_11G079400										SoyL07_11G080000	SoyL08_11G078300	SoyL09_UG040800	SoyC01_01G176000			SoyC04_08G121600	SoyC05_11G079200	SoyC06_11G075000		SoyC08_11G074700	SoyC09_11G075100				SoyC13_11G079000
GmPLDδ2	Glyma.01g162100	Glyso.11g029332.1	SoyZH13_01G145400	SoyW01_01G181300	SoyW02_01G182000	SoyW03_01G182600	SoyL01_01G175600	SoyL02_01G179100	SoyL03_01G177900	SoyL04_01G181100	SoyL05_01G177900	SoyL06_01G178500	SoyL07_01G179100	SoyL08_01G179100	SoyL09_01G178500	SoyC01_11G077400	SoyC02_11G075200	SoyC03_01G179600	SoyC04_11G080400	SoyC05_01G178200	SoyC06_01G178000	SoyC07_01G175200	SoyC08_01G180500	SoyC09_01G177500	SoyC10_01G177200	SoyC11_01G177600	SoyC12_01G180000	SoyC13_01G180000	SoyC14_01G179900
GmPLDδ3	Glyma.05g168300	Glyso.06g013499.1		SoyW01_06G019600	SoyW02_06G018400	SoyW03_05G178000	SoyL01_11G075800	SoyL02_06G017600	SoyL03_06G020600	SoyL04_06G018700	SoyL05_05G169900	SoyL06_05G173000	SoyL07_05G176900	SoyL08_05G176200	SoyL09_05G173900	SoyC01_06G017200	SoyC02_06G017900	SoyC03_05G174100	SoyC04_04G018000	SoyC05_05G174900	SoyC06_05G169700	SoyC07_06G018400	SoyC08_05G169300	SoyC09_05G170600	SoyC10_06G018400	SoyC11_06G017800	SoyC12_05G171400	SoyC13_05G176500	SoyC14_06G018200
GmPLDδ4	Glyma.06g020500	Glyso.05g012539.1		SoyW01_08G122800	SoyW02_08G115700	SoyW03_06G019100		SoyL02_11G076100	SoyL03_08G117300	SoyL04_11G079000	SoyL05_08G117000	SoyL06_06G018500	SoyL07_06G018900	SoyL08_06G018700	SoyL09_06G018800	SoyC01_05G171900	SoyC02_04G017800	SoyC03_06G018700	SoyC04_05G174400	SoyC05_06G019500	SoyC06_06G018500	SoyC07_08G116600	SoyC08_06G018300	SoyC09_06G018200	SoyC10_08G117500	SoyC11_08G116900	SoyC12_06G018600	SoyC13_06G018900	SoyC14_11G076300
GmPLDδ5	Glyma.04g020400	Glyso.08g020389.1	SoyZH13_04G019500	SoyW01_04G018600	SoyW02_04G018200	SoyW03_04G019100	SoyL01_06G018000	SoyL02_04G018200	SoyL03_04G017500	SoyL04_04G019200	SoyL05_04G017900	SoyL06_04G017500	SoyL07_04G018900	SoyL08_04G018700	SoyL09_04G018700	SoyC01_08G118600	SoyC02_08G115500	SoyC03_04G018200	SoyC04_01G173100	SoyC05_04G018500	SoyC06_04G017200	SoyC07_04G017800	SoyC08_04G017900	SoyC09_04G017600	SoyC10_04G017700	SoyC11_04G017200	SoyC12_04G018000	SoyC13_04G018800	SoyC14_04G017800
GmPLDδ6	Glyma.08g126700	Glyso.04g008526.2	SoyZH13_08G120800	SoyW01_11G078700	SoyW02_11G278500	SoyW03_11G078900			SoyL03_11G076100		SoyL05_11G075300	SoyL06_11G075100	SoyL07_08G123900	SoyL08_08G123400	SoyL09_11G077900	SoyC01_04G018300	SoyC02_01G173500	SoyC03_11G079100	SoyC04_06G018200	SoyC05_08G124100	SoyC06_08G117000	SoyC07_11G077000	SoyC08_08G116800	SoyC09_08G115800	SoyC10_11G075100	SoyC11_11G074300	SoyC12_11G075800	SoyC13_08G124000
GmPLDε1	Glyma.07g010900	Glyso.07g016557.1	SoyZH13_07G009700	SoyW01_07G010000	SoyW02_07G009900	SoyW03_07G010600	SoyL01_07G010300	SoyL02_07G010000	SoyL03_07G010000	SoyL04_07G011000	SoyL05_07G010300	SoyL06_07G009400	SoyL07_07G009900	SoyL08_07G010200	SoyL09_07G010400	SoyC01_07G009700	SoyC02_07G010000	SoyC03_07G010000	SoyC04_07G010700	SoyC05_07G010100	SoyC06_07G009500	SoyC07_07G009600	SoyC08_07G009900	SoyC09_07G009600	SoyC10_07G010000	SoyC11_07G009600	SoyC12_07G010000	SoyC13_07G010200	SoyC14_07G009400
GmPLDε2	Glyma.15g023500	Glyso.15g039764.1	SoyZH13_15G022700	SoyW01_15G023500	SoyW02_15G022500	SoyW03_15G023900	SoyL01_15G021800	SoyL02_15G022100	SoyL03_15G022100	SoyL04_15G023100	SoyL05_15G022400	SoyL06_15G021700	SoyL07_15G023000	SoyL08_15G022700	SoyL09_15G022700	SoyC01_15G022200	SoyC02_15G021900	SoyC03_15G024100	SoyC04_15G022700	SoyC05_15G023100	SoyC06_15G022600	SoyC07_15G021800	SoyC08_15G021800	SoyC09_15G021500	SoyC10_15G021600	SoyC11_15G021900	SoyC12_15G022100	SoyC13_15G023000	SoyC14_15G022200
GmPLDε3	Glyma.08g194100	Glyso.08g021037.2	SoyZH13_08G185300	SoyW01_08G189200	SoyW02_08G178300	SoyW03_08G192200	SoyL01_08G182200		SoyL03_08G179100	SoyL04_08G190000	SoyL05_08G179800	SoyL06_08G193400	SoyL07_08G190800	SoyL08_08G190200	SoyL09_08G186300	SoyC01_08G182000	SoyC02_08G178100	SoyC03_08G189100	SoyC04_08G187400	SoyC05_08G190100	SoyC06_08G178100	SoyC07_08G179500	SoyC08_08G180400	SoyC09_08G179000	SoyC10_08G180300	SoyC11_08G179400	SoyC12_08G180600	SoyC13_08G190000	SoyC14_08G181100
GmPLDζ1	Glyma.20g238000	Glyso.09g023147.1	SoyZH13_20G221600	SoyW01_20G243900	SoyW02_20G227600	SoyW03_20G254400	SoyL01_20G231400	SoyL02_20G235200	SoyL03_20G233800	SoyL04_20G252200	SoyL05_20G232400	SoyL06_20G237300	SoyL07_20G244800	SoyL08_20G245600	SoyL09_20G242100	SoyC01_20G230900	SoyC02_20G231700	SoyC03_20G243700	SoyC04_09G042700	SoyC05_09G043500	SoyC06_20G231000		SoyC08_20G234800	SoyC09_20G230900	SoyC10_20G230600	SoyC11_20G232000	SoyC12_20G235100	SoyC13_20G248500	SoyC14_20G233200
GmPLDζ2	Glyma.15g152100	Glyso.15g041007.1	SoyZH13_15G146000	SoyW01_15G149900	SoyW02_15G142800	SoyW03_15G153000	SoyL01_15G142900	SoyL02_15G140500	SoyL03_15G141100	SoyL04_15G149600	SoyL05_15G141300	SoyL06_15G142400	SoyL07_15G151000	SoyL08_15G150000	SoyL09_15G150000	SoyC01_15G141900	SoyC02_15G141600	SoyC03_15G153200	SoyC04_15G150200	SoyC05_15G149900	SoyC06_15G142900	SoyC07_15G141600	SoyC08_15G140500	SoyC09_15G141300	SoyC10_15G141900	SoyC11_15G141200	SoyC12_15G141800	SoyC13_15G150300	SoyC14_15G143700
GmPLDζ3	Glyma.09g041400	Glyso.20g055040.1	SoyZH13_09G039200	SoyW01_09G042000	SoyW02_09G038500	SoyW03_09G042400	SoyL01_09G038100	SoyL02_09G039900	SoyL03_09G038600	SoyL04_09G043500	SoyL05_09G039600	SoyL06_09G039600	SoyL07_09G042600	SoyL08_09G043100	SoyL09_09G043300	SoyC01_09G039500	SoyC02_09G038800	SoyC03_09G042800	SoyC04_20G242700	SoyC05_20G245200	SoyC06_09G039900	SoyC07_09G039900	SoyC08_09G039900	SoyC09_09G040400	SoyC10_09G039300	SoyC11_09G039200	SoyC12_09G038700	SoyC13_09G043100	SoyC14_09G039300
GmPLDφ1	Glyma.04g060900	Glyso.04g008920.1	SoyZH13_04G057800	SoyW01_04G057700	SoyW02_04G056000	SoyW03_04G058000	SoyL01_04G055000	SoyL02_04G056200	SoyL03_04G055000	SoyL04_04G058700	SoyL05_04G055200	SoyL06_04G055100	SoyL07_04G058500	SoyL08_04G058300	SoyL09_04G058600	SoyC01_04G055600	SoyC02_04G055700	SoyC03_04G057800	SoyC04_04G057200	SoyC05_04G058000	SoyC06_06G056100	SoyC07_04G055500	SoyC08_04G055400	SoyC09_04G055300	SoyC10_04G055600	SoyC11_04G054900	SoyC12_04G055100	SoyC13_04G058500	SoyC14_04G055300
GmPLDφ2	Glyma.06g061500	Glyso.06g013896.1	SoyZH13_06G057700	SoyW01_06G058300	SoyW02_06G055000	SoyW03_06G057900	SoyL01_06G056300	SoyL02_06G054700	SoyL03_06G058100	SoyL04_06G058000	SoyL05_06G057500	SoyL06_06G055900	SoyL07_06G057900	SoyL08_06G057800	SoyL09_06G057900	SoyC01_06G054500	SoyC02_06G055200	SoyC03_06G058900	SoyC04_06G057600	SoyC05_06G058700	SoyC06_06G056100	SoyC07_06G055000	SoyC08_06G056300	SoyC09_06G055400	SoyC10_06G054800	SoyC11_06G055200	SoyC12_06G057200	SoyC13_06G057800	SoyC14_06G055600
The W82 genome assembly was obtained from Soybase (https://legacy.soybase.org/). The W05 wild soybean genome data were sourced from the Wild Soybean Database (http://www.wildsoydb.org/Gsoja_W05/). Genomic information for the remaining 26 accessions was derived from the published pan-genome study by Liu et al. (2020; "Pan-Genome of Wild and Cultivated Soybeans").

## Sheet: S5
Table S5 The distribution quantity of different GmPLD subfamilies across various varieties.
Gene	W82	W05	ZH13	SoyW01	SoyW02	SoyW03	SoyL01	SoyL02	SoyL03	SoyL04	SoyL05	SoyL06	SoyL07	SoyL08	SoyL09	SoyC01	SoyC02	SoyC03	SoyC04	SoyC05	SoyC06	SoyC07	SoyC08	SoyC09	SoyC10	SoyC11	SoyC12	SoyC13	SoyC14
PLDα	6	5	5	5	4	5	3	4	4	5	4	4	5	5	5	4	4	4	4	5	4	4	5	4	4	4	4	5	4
PLDβ	4	4	3	3	3	3	2	3	3	4	3	3	3	3	3	3	3	3	3	3	3	3	3	3	3	3	3	3	2
PLDδ	6	6	4	5	5	5	3	4	5	4	5	5	6	6	6	6	5	5	6	6	6	5	6	6	5	5	5	6	4
PLDε	3	3	3	3	3	3	3	2	3	3	3	3	3	3	3	3	3	3	3	3	3	3	3	3	3	3	3	3	3
PLDγ	1	1	1	1	1	1	1	1	1	1	1	1	1	1	1	1	1	1	1	1	1	1	1	1	1	1	1	1	0
PLDφ	2	2	2	2	2	2	2	2	2	2	2	2	2	2	2	2	2	2	2	2	2	2	2	2	2	2	2	2	2
PLDζ	3	3	3	3	3	3	3	3	3	3	3	3	3	3	3	3	3	3	3	3	3	2	3	3	3	3	3	3	3
SUM	25	24	21	22	21	22	17	19	21	22	21	21	23	23	23	22	21	21	22	23	22	20	23	22	21	21	21	23	18
The W82 genome assembly was obtained from Soybase (https://legacy.soybase.org/). The W05 wild soybean genome data were sourced from the Wild Soybean Database (http://www.wildsoydb.org/Gsoja_W05/). Genomic information for the remaining 26 accessions was derived from the published pan-genome study by Liu et al. (2020; "Pan-Genome of Wild and Cultivated Soybeans").

## Sheet: S6
Table S6 Analyses the motifs in GmPLDs from the MEME website.
Motif	Width	Best possible match
1	50	RRFMIYVHSKGMIVDDEYVIJGSANINQRSMDGTRDTEIAMGAYQPHHTW
2	41	VCGKBLVIDRSIHTAYVKAIRRAQHFIYIENQYFJGSSYAW
3	41	ERFAVYIVIPMWPEGVPESAAVQEILFWQRRTMZMMYEDIA
4	33	PRZPWHDJHCKJEGPAAYDVLTNFEQRWRKAKK
5	29	RKIVAFIGGLDLCDGRYDTPEHSLFRTLD
6	50	PRGQIHGYRMSLWAEHLGTJEECFLEPESLECVRRVNKIAEKNWKIYSSE
7	32	WEDIFDAIEEAKHLIYITGWSVYHEVRLVRDP

## Sheet: S7
Table S7 Cis-element analyses of the GmPLD genes promoter regions.
Gene Name	Starting postion (bp)	Ending postion (bp)	Predicted Cis-element
GmPLDα1	880	896	Light responsive
GmPLDα1	1273	1288	Defense and stress responsive
GmPLDα1	1287	1302	Elicitor-mediated activation
GmPLDα1	1900	1915	Light responsive
GmPLDα1	881	895	Abscisic acid responsive
GmPLDα1	1001	1014	Estrogen response
GmPLDα1	1790	1803	Estrogen response
GmPLDα1	802	815	Light responsive
GmPLDα1	803	814	Abscisic acid responsive
GmPLDα1	883	894	Abscisic acid responsive
GmPLDα1	905	916	Abscisic acid responsive
GmPLDα1	1012	1023	Anaerobic induction
GmPLDα1	17	28	Light responsive
GmPLDα1	362	373	Light responsive
GmPLDα1	803	814	Light responsive
GmPLDα1	883	894	Light responsive
GmPLDα1	905	916	Light responsive
GmPLDα1	803	814	Light responsive
GmPLDα1	883	894	Light responsive
GmPLDα1	67	78	Light responsive
GmPLDα1	804	814	Abscisic acid responsive
GmPLDα1	884	894	Abscisic acid responsive
GmPLDα1	906	916	Abscisic acid responsive
GmPLDα1	767	777	MeJA-responsive
GmPLDα1	767	777	Salicylic acid responsive
GmPLDα1	635	625	Defense and stress responsive
GmPLDα1	767	757	MeJA-responsive
GmPLDα1	905	894	Abscisic acid responsive
GmPLDα1	1122	1111	Anaerobic induction
GmPLDα1	1988	1977	Auxin responsive
GmPLDα1	302	291	Drought-inducibility
GmPLDα1	1109	1098	Light responsive
GmPLDα1	1293	1282	Light responsive
GmPLDα1	1314	1303	Light responsive
GmPLDα1	1352	1341	Light responsive
GmPLDα1	1428	1417	Light responsive
GmPLDα1	1916	1905	Light responsive
GmPLDα1	1933	1922	Light responsive
GmPLDα1	1235	1223	Light responsive
GmPLDα1	64	52	Light responsive
GmPLDα1	671	658	Estrogen response
GmPLDα1	1134	1121	Estrogen response
GmPLDα1	1643	1630	Estrogen response
GmPLDα1	82	69	Light responsive
GmPLDα1	1535	1522	Light responsive
GmPLDα1	599	586	Wound-responsive
GmPLDα1	1272	1258	Salicylic acid responsive
GmPLDα2	512	527	Elicitor-mediated activation
GmPLDα2	935	950	Elicitor-mediated activation
GmPLDα2	405	420	Light responsive
GmPLDα2	324	338	Defense and stress responsive
GmPLDα2	2	16	Salicylic acid responsive
GmPLDα2	1118	1131	Estrogen response
GmPLDα2	1865	1878	Estrogen response
GmPLDα2	1677	1689	Gibberellin-responsive
GmPLDα2	1244	1256	Light responsive
GmPLDα2	941	952	Light responsive
GmPLDα2	1241	1251	Defense and stress responsive
GmPLDα2	85	74	Defense and stress responsive
GmPLDα2	1070	1059	Light responsive
GmPLDα2	1570	1559	Light responsive
GmPLDα2	1577	1566	Light responsive
GmPLDα2	1586	1575	Light responsive
GmPLDα2	1610	1599	Light responsive
GmPLDα2	1911	1900	Light responsive
GmPLDα2	189	178	Light responsive
GmPLDα2	1728	1717	Light responsive
GmPLDα2	188	176	Light responsive
GmPLDα2	611	599	Light responsive
GmPLDα2	215	202	Estrogen response
GmPLDα2	1178	1165	Estrogen response
GmPLDα2	1978	1965	Light responsive
GmPLDα2	299	285	Salicylic acid responsive
GmPLDα2	920	906	Salicylic acid responsive
GmPLDα2	1251	1237	Wound-responsive
GmPLDα3	1047	1062	Elicitor-mediated activation
GmPLDα3	1833	1848	Light responsive
GmPLDα3	1827	1841.5	Light responsive
GmPLDα3	470	484	Light responsive
GmPLDα3	714	728	Zein metabolism regulation
GmPLDα3	1334	1347	Estrogen response
GmPLDα3	1563	1576	Light responsive
GmPLDα3	675	686	Abscisic acid responsive
GmPLDα3	1041	1052	Anaerobic induction
GmPLDα3	1541	1552	Anaerobic induction
GmPLDα3	774	785	Dehydration
GmPLDα3	21	32	Light responsive
GmPLDα3	37	48	Light responsive
GmPLDα3	74	85	Light responsive
GmPLDα3	418	429	Light responsive
GmPLDα3	848	859	Light responsive
GmPLDα3	855	866	Light responsive
GmPLDα3	675	686	Light responsive
GmPLDα3	675	686	Light responsive
GmPLDα3	188	199	Light responsive
GmPLDα3	116	126	Abscisic acid responsive
GmPLDα3	676	686	Abscisic acid responsive
GmPLDα3	770	780	Abscisic acid responsive
GmPLDα3	919	929	MeJA-responsive
GmPLDα3	471	481	MeJA-responsive
GmPLDα3	471	481	Salicylic acid responsive
GmPLDα3	471	461	MeJA-responsive
GmPLDα3	919	909	MeJA-responsive
GmPLDα3	919	909	Salicylic acid responsive
GmPLDα3	633	622	Anaerobic induction
GmPLDα3	1354	1343	Anaerobic induction
GmPLDα3	1151	1140	Light responsive
GmPLDα3	1677	1666	Light responsive
GmPLDα3	1968	1957	Light responsive
GmPLDα3	769	758	Light responsive
GmPLDα3	115	104	Light responsive
GmPLDα3	1735	1724	Light responsive
GmPLDα3	1880	1868	Light responsive
GmPLDα3	56	43	Estrogen response
GmPLDα3	1584	1571	Estrogen response
GmPLDα3	1666	1653	Estrogen response
GmPLDα3	1490	1476	Circadian control
GmPLDα3	367	353	Salicylic acid responsive
GmPLDα3	653	639	Salicylic acid responsive
GmPLDα3	537	523	Salicylic acid responsive
GmPLDα3	756	742	Salicylic acid responsive
GmPLDα4	1108	1124	Salicylic acid responsive
GmPLDα4	450	464	Circadian control
GmPLDα4	681	695	Defense and stress responsive
GmPLDα4	1099	1113	Salicylic acid responsive
GmPLDα4	1113	1127	Salicylic acid responsive
GmPLDα4	1037	1050	Estrogen response
GmPLDα4	1210	1223	Estrogen response
GmPLDα4	1685	1698	Estrogen response
GmPLDα4	1425	1438	Light responsive
GmPLDα4	854	866	Endosperm expression
GmPLDα4	535	547	Light responsive
GmPLDα4	1773	1785	Light responsive
GmPLDα4	606	617	Light responsive
GmPLDα4	1563	1574	Light responsive
GmPLDα4	1099	1110	Wound-responsive
GmPLDα4	428	438	Defense and stress responsive
GmPLDα4	525	535	Defense and stress responsive
GmPLDα4	1344	1333	Anaerobic induction
GmPLDα4	1875	1864	Anaerobic induction
GmPLDα4	1218	1207	Light responsive
GmPLDα4	1225	1214	Light responsive
GmPLDα4	1858	1847	Light responsive
GmPLDα4	1988	1977	Light responsive
GmPLDα4	1039	1026	Estrogen response
GmPLDα4	1212	1199	Estrogen response
GmPLDα4	810	797	Light responsive
GmPLDα4	1123	1109	Light responsive
GmPLDα4	1539	1524	Light responsive
GmPLDα4	348	333	Light responsive
GmPLDα5	190	205	Salicylic acid responsive
GmPLDα5	1058	1072	Salicylic acid responsive
GmPLDα5	1083	1097	Salicylic acid responsive
GmPLDα5	432	445	Estrogen response
GmPLDα5	1701	1714	Estrogen response
GmPLDα5	289	302	Light responsive
GmPLDα5	89	100	Abscisic acid responsive
GmPLDα5	8	19	Light responsive
GmPLDα5	168	179	Light responsive
GmPLDα5	726	737	Light responsive
GmPLDα5	882	893	Light responsive
GmPLDα5	894	905	Light responsive
GmPLDα5	89	100	Light responsive
GmPLDα5	474	485	Light responsive
GmPLDα5	1874	1885	Wound-responsive
GmPLDα5	90	100	Abscisic acid responsive
GmPLDα5	188	198	MeJA-responsive
GmPLDα5	471	481	MeJA-responsive
GmPLDα5	250	260	MeJA-responsive
GmPLDα5	538	548	MeJA-responsive
GmPLDα5	1470	1480	MeJA-responsive
GmPLDα5	250	260	Salicylic acid responsive
GmPLDα5	538	548	Salicylic acid responsive
GmPLDα5	1470	1480	Salicylic acid responsive
GmPLDα5	479	469	Defense and stress responsive
GmPLDα5	250	240	MeJA-responsive
GmPLDα5	538	528	MeJA-responsive
GmPLDα5	1470	1460	MeJA-responsive
GmPLDα5	188	178	MeJA-responsive
GmPLDα5	471	461	MeJA-responsive
GmPLDα5	188	178	Salicylic acid responsive
GmPLDα5	471	461	Salicylic acid responsive
GmPLDα5	89	78	Abscisic acid responsive
GmPLDα5	1586	1575	Light responsive
GmPLDα5	1633	1622	Light responsive
GmPLDα5	1813	1802	Light responsive
GmPLDα5	1862	1851	Light responsive
GmPLDα5	1782	1771	Light responsive
GmPLDα5	1557	1544	Estrogen response
GmPLDα5	1617	1604	Estrogen response
GmPLDα5	1193	1180	Wound-responsive
GmPLDα5	708	693	Light responsive
GmPLDα6	1152	1166	Wound-responsive
GmPLDα6	726	739	Estrogen response
GmPLDα6	1144	1157	Estrogen response
GmPLDα6	1185	1198	Estrogen response
GmPLDα6	1253	1266	Estrogen response
GmPLDα6	1304	1317	Estrogen response
GmPLDα6	1796	1809	Estrogen response
GmPLDα6	354	367	Light responsive
GmPLDα6	1788	1801	Light responsive
GmPLDα6	185	196	Light responsive
GmPLDα6	911	922	Light responsive
GmPLDα6	915	926	Light responsive
GmPLDα6	939	950	Light responsive
GmPLDα6	991	1002	Light responsive
GmPLDα6	589	600	Light responsive
GmPLDα6	1786	1797	Light responsive
GmPLDα6	859	869	Abscisic acid responsive
GmPLDα6	1985	1995	Defense and stress responsive
GmPLDα6	443	453	MeJA-responsive
GmPLDα6	443	453	Salicylic acid responsive
GmPLDα6	589	579	Abscisic acid responsive
GmPLDα6	1215	1205	Defense and stress responsive
GmPLDα6	443	433	MeJA-responsive
GmPLDα6	1090	1079	Light responsive
GmPLDα6	1108	1097	Light responsive
GmPLDα6	1337	1326	Light responsive
GmPLDα6	1486	1475	Light responsive
GmPLDα6	1657	1646	Light responsive
GmPLDα6	858	847	Light responsive
GmPLDα6	1628	1617	Light responsive
GmPLDα6	222	211	Light responsive
GmPLDα6	654	643	Meristem expression
GmPLDα6	395	383	Gibberellin-responsive
GmPLDα6	1627	1615	Light responsive
GmPLDα6	1217	1204	Light responsive
GmPLDα6	333	319	Defense and stress responsive
GmPLDα6	1217	1203	Light responsive
GmPLDα6	1521	1507	Light responsive
GmPLDα6	1384	1370	Salicylic acid responsive
GmPLDα6	482	468	Wound-responsive
GmPLDα6	490	476	Wound-responsive
GmPLDβ1	1810	1824	Circadian control
GmPLDβ1	371	385	Salicylic acid responsive
GmPLDβ1	1816	1828	Gibberellin-responsive
GmPLDβ1	152	163	Anaerobic induction
GmPLDβ1	450	461	Anaerobic induction
GmPLDβ1	390	401	Meristem expression
GmPLDβ1	603	614	Wound-responsive
GmPLDβ1	401	411	Defense and stress responsive
GmPLDβ1	162	152	Defense and stress responsive
GmPLDβ1	1475	1464	Anaerobic induction
GmPLDβ1	1967	1956	Anaerobic induction
GmPLDβ1	52	41	Drought-inducibility
GmPLDβ1	1240	1229	Drought-inducibility
GmPLDβ1	868	857	Light responsive
GmPLDβ1	1329	1318	Light responsive
GmPLDβ1	415	404	Light responsive
GmPLDβ1	1980	1969	Light responsive
GmPLDβ1	308	297	Meristem expression
GmPLDβ1	696	685	Meristem expression
GmPLDβ1	1493	1481	Gibberellin-responsive
GmPLDβ1	1328	1316	Light responsive
GmPLDβ1	358	344	Wound-responsive
GmPLDβ2	1445	1460	Elicitor-mediated activation
GmPLDβ2	575	589	Zein metabolism regulation
GmPLDβ2	107	120	Estrogen response
GmPLDβ2	1607	1620	Light responsive
GmPLDβ2	864	875	Anaerobic induction
GmPLDβ2	750	761	Auxin responsive
GmPLDβ2	1920	1931	Auxin responsive
GmPLDβ2	597	608	Defense and stress responsive
GmPLDβ2	1372	1383	Dehydration
GmPLDβ2	1931	1942	Drought-inducibility
GmPLDβ2	1851	1862	Light responsive
GmPLDβ2	1666	1676	Abscisic acid responsive
GmPLDβ2	1911	1921	Abscisic acid responsive
GmPLDβ2	1994	2004	Abscisic acid responsive
GmPLDβ2	42	32	Defense and stress responsive
GmPLDβ2	145	135	Defense and stress responsive
GmPLDβ2	1698	1688	Defense and stress responsive
GmPLDβ2	1910	1899	Abscisic acid responsive
GmPLDβ2	1665	1654	Light responsive
GmPLDβ2	1910	1899	Light responsive
GmPLDβ2	1993	1982	Light responsive
GmPLDβ2	1910	1899	Light responsive
GmPLDβ2	171	160	Light responsive
GmPLDβ2	1971	1960	Light responsive
GmPLDβ2	1909	1896	Abscisic acid responsive
GmPLDβ2	209	196	Light responsive
GmPLDβ2	1663	1649	Light responsive
GmPLDβ2	1908	1894	Light responsive
GmPLDβ2	564	549	Elicitor-mediated activation
GmPLDβ3	1775	1760	Light responsive
GmPLDβ3	1680	1698	Light responsive
GmPLDβ3	485	500	Defense and stress responsive
GmPLDβ3	1322	1336	Salicylic acid responsive
GmPLDβ3	475	489	Salicylic acid responsive
GmPLDβ3	1426	1440	Wound-responsive
GmPLDβ3	95	106	Light responsive
GmPLDβ3	839	850	Light responsive
GmPLDβ3	881	892	Light responsive
GmPLDβ3	885	896	Light responsive
GmPLDβ3	201	212	Light responsive
GmPLDβ3	203	213	MeJA-responsive
GmPLDβ3	1058	1068	MeJA-responsive
GmPLDβ3	201	191	Abscisic acid responsive
GmPLDβ3	1840	1830	Defense and stress responsive
GmPLDβ3	203	193	MeJA-responsive
GmPLDβ3	1058	1048	MeJA-responsive
GmPLDβ3	203	193	Salicylic acid responsive
GmPLDβ3	1058	1048	Salicylic acid responsive
GmPLDβ3	183	172	Drought-inducibility
GmPLDβ3	1012	1001	Light responsive
GmPLDβ3	1312	1301	Light responsive
GmPLDβ3	1485	1474	Light responsive
GmPLDβ3	1500	1489	Light responsive
GmPLDβ3	1541	1530	Light responsive
GmPLDβ3	1593	1582	Light responsive
GmPLDβ3	1035	1024	Light responsive
GmPLDβ3	511	500	Meristem expression
GmPLDβ3	406	394	Endosperm expression
GmPLDβ3	1034	1022	Light responsive
GmPLDβ3	923	910	Estrogen response
GmPLDβ3	1124	1111	Estrogen response
GmPLDβ3	1306	1293	Estrogen response
GmPLDβ3	669	656	Light responsive
GmPLDβ3	1232	1219	Light responsive
GmPLDβ3	1467	1453	Light responsive
GmPLDβ3	567	553	Wound-responsive
GmPLDβ3	1838	1823	Light responsive
GmPLDβ4	37	51	Salicylic acid responsive
GmPLDβ4	1438	1452	Salicylic acid responsive
GmPLDβ4	1515	1529	Salicylic acid responsive
GmPLDβ4	1137	1151	Wound-responsive
GmPLDβ4	1320	1333	Estrogen response
GmPLDβ4	1376	1389	Estrogen response
GmPLDβ4	1915	1927	Gibberellin-responsive
GmPLDβ4	1349	1361	Light responsive
GmPLDβ4	1946	1957	Drought-inducibility
GmPLDβ4	5	16	Light responsive
GmPLDβ4	298	309	Light responsive
GmPLDβ4	500	511	Light responsive
GmPLDβ4	823	834	Light responsive
GmPLDβ4	809	820	Light responsive
GmPLDβ4	579	590	Light responsive
GmPLDβ4	1048	1059	Light responsive
GmPLDβ4	579	569	Abscisic acid responsive
GmPLDβ4	809	799	Abscisic acid responsive
GmPLDβ4	537	526	Light responsive
GmPLDβ4	890	878	Endosperm expression
GmPLDβ4	984	972	Gibberellin-responsive
GmPLDβ4	536	524	Light responsive
GmPLDβ4	769	756	Estrogen response
GmPLDβ4	1133	1120	Estrogen response
GmPLDβ4	1339	1326	Estrogen response
GmPLDβ4	1334	1321	Light responsive
GmPLDβ4	928	914	Circadian control
GmPLDγ1	1953	1968	Light responsive
GmPLDγ1	1081	1095	Light responsive
GmPLDγ1	843	857	Wound-responsive
GmPLDγ1	872	886	Wound-responsive
GmPLDγ1	784	797	Estrogen response
GmPLDγ1	1901	1914	Light responsive
GmPLDγ1	1249	1260	Anaerobic induction
GmPLDγ1	792	803	Light responsive
GmPLDγ1	941	952	Light responsive
GmPLDγ1	544	555	Light responsive
GmPLDγ1	195	206	Light responsive
GmPLDγ1	820	831	Light responsive
GmPLDγ1	440	451	Light responsive
GmPLDγ1	544	534	Abscisic acid responsive
GmPLDγ1	900	889	Anaerobic induction
GmPLDγ1	1039	1028	Light responsive
GmPLDγ1	1534	1523	Light responsive
GmPLDγ1	1803	1792	Light responsive
GmPLDγ1	1841	1830	Light responsive
GmPLDγ1	1880	1869	Light responsive
GmPLDγ1	118	107	Light responsive
GmPLDγ1	301	289	Dehydration
GmPLDγ1	743	730	Estrogen response
GmPLDγ1	786	773	Estrogen response
GmPLDγ1	1776	1763	Light responsive
GmPLDγ1	992	978	Circadian control
GmPLDγ1	615	601	Defense and stress responsive
GmPLDγ1	1757	1743	Defense and stress responsive
GmPLDγ1	81	67	Salicylic acid responsive
GmPLDδ1	1752	1770	Light responsive
GmPLDδ1	920	935	Defense and stress responsive
GmPLDδ1	768	782	Abscisic acid responsive
GmPLDδ1	1724	1738	Light responsive
GmPLDδ1	1383	1397	Light responsive
GmPLDδ1	778	792	Salicylic acid responsive
GmPLDδ1	1968	1982	Zein metabolism regulation
GmPLDδ1	121	132	Abscisic acid responsive
GmPLDδ1	601	612	Anaerobic induction
GmPLDδ1	1583	1594	Anaerobic induction
GmPLDδ1	1956	1967	Anaerobic induction
GmPLDδ1	250	261	Defense and stress responsive
GmPLDδ1	1557	1568	Drought-inducibility
GmPLDδ1	121	132	Light responsive
GmPLDδ1	121	132	Light responsive
GmPLDδ1	122	132	Abscisic acid responsive
GmPLDδ1	942	952	Abscisic acid responsive
GmPLDδ1	1606	1616	Abscisic acid responsive
GmPLDδ1	1972	1982	Abscisic acid responsive
GmPLDδ1	1970	1980	MeJA-responsive
GmPLDδ1	1970	1980	Salicylic acid responsive
GmPLDδ1	1970	1960	MeJA-responsive
GmPLDδ1	1605	1594	Abscisic acid responsive
GmPLDδ1	336	325	Anaerobic induction
GmPLDδ1	1530	1519	Light responsive
GmPLDδ1	1534	1523	Light responsive
GmPLDδ1	1672	1661	Light responsive
GmPLDδ1	1816	1805	Light responsive
GmPLDδ1	941	930	Light responsive
GmPLDδ1	1605	1594	Light responsive
GmPLDδ1	1605	1594	Light responsive
GmPLDδ1	1971	1960	Light responsive
GmPLDδ1	1858	1845	Light responsive
GmPLDδ1	1021	1008	Light responsive
GmPLDδ1	94	80	Wound-responsive
GmPLDδ1	1986	1971	Light responsive
GmPLDδ2	835	850	Elicitor-mediated activation
GmPLDδ2	355	369	Light responsive
GmPLDδ2	1654	1668	Wound-responsive
GmPLDδ2	1974	1988	Zein metabolism regulation
GmPLDδ2	230	243	Estrogen response
GmPLDδ2	694	707	Estrogen response
GmPLDδ2	609	621	Dehydration
GmPLDδ2	659	671	Gibberellin-responsive
GmPLDδ2	839	850	Anaerobic induction
GmPLDδ2	1707	1718	Anaerobic induction
GmPLDδ2	421	432	Defense and stress responsive
GmPLDδ2	1679	1690	Drought-inducibility
GmPLDδ2	1051	1061	Abscisic acid responsive
GmPLDδ2	1092	1102	Abscisic acid responsive
GmPLDδ2	1733	1743	Abscisic acid responsive
GmPLDδ2	904	914	MeJA-responsive
GmPLDδ2	904	914	Salicylic acid responsive
GmPLDδ2	904	894	MeJA-responsive
GmPLDδ2	1091	1080	Abscisic acid responsive
GmPLDδ2	1732	1721	Abscisic acid responsive
GmPLDδ2	506	495	Anaerobic induction
GmPLDδ2	664	653	Anaerobic induction
GmPLDδ2	1498	1487	Auxin responsive
GmPLDδ2	1770	1759	Auxin responsive
GmPLDδ2	1156	1145	Light responsive
GmPLDδ2	1661	1650	Light responsive
GmPLDδ2	1665	1654	Light responsive
GmPLDδ2	1050	1039	Light responsive
GmPLDδ2	1091	1080	Light responsive
GmPLDδ2	1732	1721	Light responsive
GmPLDδ2	1091	1080	Light responsive
GmPLDδ2	1732	1721	Light responsive
GmPLDδ2	80	68	Gibberellin-responsive
GmPLDδ2	513	499	Circadian control
GmPLDδ2	130	116	Defense and stress responsive
GmPLDδ2	380	366	Salicylic acid responsive
GmPLDδ2	281	266	Defense and stress responsive
GmPLDδ2	355	340	Light responsive
GmPLDδ3	541	558	Light responsive
GmPLDδ3	542	558	Light responsive
GmPLDδ3	543	557	Abscisic acid responsive
GmPLDδ3	1401	1415	Defense and stress responsive
GmPLDδ3	1243	1257	Light responsive
GmPLDδ3	544	558	Light responsive
GmPLDδ3	543	557	Light responsive
GmPLDδ3	544	557	Abscisic acid responsive
GmPLDδ3	554	566	Light responsive
GmPLDδ3	638	650	Light responsive
GmPLDδ3	545	556	Abscisic acid responsive
GmPLDδ3	666	677	Abscisic acid responsive
GmPLDδ3	383	394	Anaerobic induction
GmPLDδ3	1492	1503	Drought-inducibility
GmPLDδ3	545	556	Light responsive
GmPLDδ3	666	677	Light responsive
GmPLDδ3	545	556	Light responsive
GmPLDδ3	1405	1416	Light responsive
GmPLDδ3	546	556	Abscisic acid responsive
GmPLDδ3	667	677	Abscisic acid responsive
GmPLDδ3	1093	1103	Abscisic acid responsive
GmPLDδ3	82	92	Defense and stress responsive
GmPLDδ3	149	159	Defense and stress responsive
GmPLDδ3	69	59	Defense and stress responsive
GmPLDδ3	666	655	Abscisic acid responsive
GmPLDδ3	661	650	Auxin responsive
GmPLDδ3	1615	1604	Light responsive
GmPLDδ3	1632	1621	Light responsive
GmPLDδ3	1687	1676	Light responsive
GmPLDδ3	913	902	Light responsive
GmPLDδ3	1092	1081	Light responsive
GmPLDδ3	631	620	Meristem expression
GmPLDδ3	1140	1129	Meristem expression
GmPLDδ3	908	897	Wound-responsive
GmPLDδ3	1204	1192	Light responsive
GmPLDδ3	1887	1874	Estrogen response
GmPLDδ3	591	578	Light responsive
GmPLDδ3	1476	1463	Wound-responsive
GmPLDδ3	758	745	Zein metabolism regulation
GmPLDδ3	543	529	Light responsive
GmPLDδ3	356	342	Light responsive
GmPLDδ4	998	1012	Zein metabolism regulation
GmPLDδ4	262	275	Estrogen response
GmPLDδ4	1309	1321	Endosperm expression
GmPLDδ4	942	954	Gibberellin-responsive
GmPLDδ4	1273	1285	Light responsive
GmPLDδ4	949	960	Anaerobic induction
GmPLDδ4	10	21	Light responsive
GmPLDδ4	45	56	Light responsive
GmPLDδ4	76	87	Light responsive
GmPLDδ4	91	102	Light responsive
GmPLDδ4	594	604	Abscisic acid responsive
GmPLDδ4	57	67	Defense and stress responsive
GmPLDδ4	252	262	MeJA-responsive
GmPLDδ4	1933	1943	MeJA-responsive
GmPLDδ4	1557	1547	Defense and stress responsive
GmPLDδ4	252	242	MeJA-responsive
GmPLDδ4	1933	1923	MeJA-responsive
GmPLDδ4	252	242	Salicylic acid responsive
GmPLDδ4	1933	1923	Salicylic acid responsive
GmPLDδ4	494	483	Anaerobic induction
GmPLDδ4	621	610	Anaerobic induction
GmPLDδ4	1005	994	Anaerobic induction
GmPLDδ4	1361	1350	Light responsive
GmPLDδ4	1700	1689	Light responsive
GmPLDδ4	1761	1750	Light responsive
GmPLDδ4	1852	1841	Light responsive
GmPLDδ4	593	582	Light responsive
GmPLDδ4	705	694	Wound-responsive
GmPLDδ4	1495	1484	Wound-responsive
GmPLDδ4	206	192	Light responsive
GmPLDδ5	1804	1818	Salicylic acid responsive
GmPLDδ5	1189	1203	Salicylic acid responsive
GmPLDδ5	127	140	Estrogen response
GmPLDδ5	305	318	Estrogen response
GmPLDδ5	985	998	Estrogen response
GmPLDδ5	1389	1402	Estrogen response
GmPLDδ5	1436	1449	Light responsive
GmPLDδ5	1816	1828	Gibberellin-responsive
GmPLDδ5	1717	1729	Gibberellin-responsive
GmPLDδ5	147	158	Light responsive
GmPLDδ5	600	611	Light responsive
GmPLDδ5	630	641	Light responsive
GmPLDδ5	663	674	Light responsive
GmPLDδ5	1856	1867	Meristem expression
GmPLDδ5	1865	1875	Abscisic acid responsive
GmPLDδ5	1864	1853	Abscisic acid responsive
GmPLDδ5	1350	1339	Light responsive
GmPLDδ5	1368	1357	Light responsive
GmPLDδ5	1638	1627	Light responsive
GmPLDδ5	1864	1853	Light responsive
GmPLDδ5	1864	1853	Light responsive
GmPLDδ5	1577	1566	Light responsive
GmPLDδ5	1900	1888	Gibberellin-responsive
GmPLDδ5	1576	1564	Light responsive
GmPLDδ5	129	116	Estrogen response
GmPLDδ5	1391	1378	Estrogen response
GmPLDδ5	1863	1850	Light responsive
GmPLDδ5	1177	1164	Light responsive
GmPLDδ5	1026	1013	Wound-responsive
GmPLDδ6	1607	1621	Light responsive
GmPLDδ6	1486	1499	Estrogen response
GmPLDδ6	750	762	Light responsive
GmPLDδ6	575	586	Drought-inducibility
GmPLDδ6	399	410	Light responsive
GmPLDδ6	450	461	Light responsive
GmPLDδ6	915	926	Light responsive
GmPLDδ6	948	959	Light responsive
GmPLDδ6	996	1007	Light responsive
GmPLDδ6	1417	1428	Meristem expression
GmPLDδ6	147	157	Abscisic acid responsive
GmPLDδ6	1094	1104	MeJA-responsive
GmPLDδ6	145	155	MeJA-responsive
GmPLDδ6	145	155	Salicylic acid responsive
GmPLDδ6	145	135	MeJA-responsive
GmPLDδ6	1094	1084	MeJA-responsive
GmPLDδ6	1094	1084	Salicylic acid responsive
GmPLDδ6	1078	1067	Light responsive
GmPLDδ6	1182	1171	Light responsive
GmPLDδ6	1186	1175	Light responsive
GmPLDδ6	1629	1618	Light responsive
GmPLDδ6	1777	1766	Light responsive
GmPLDδ6	146	135	Light responsive
GmPLDδ6	331	320	Light responsive
GmPLDδ6	1402	1390	Gibberellin-responsive
GmPLDδ6	1339	1326	Estrogen response
GmPLDδ6	1548	1535	Estrogen response
GmPLDδ6	1593	1580	Wound-responsive
GmPLDδ6	1252	1238	Circadian control
GmPLDδ6	1407	1393	Light responsive
GmPLDε1	1386	1400	Light responsive
GmPLDε1	1102	1116	Wound-responsive
GmPLDε1	1223	1235	Auxin responsive
GmPLDε1	289	301	Gibberellin-responsive
GmPLDε1	868	880	Gibberellin-responsive
GmPLDε1	1919	1930	Defense and stress responsive
GmPLDε1	1680	1691	Drought-inducibility
GmPLDε1	1078	1067	Light responsive
GmPLDε1	1383	1372	Light responsive
GmPLDε1	1213	1202	Light responsive
GmPLDε1	1096	1084	Endosperm expression
GmPLDε1	1212	1200	Light responsive
GmPLDε1	933	919	Salicylic acid responsive
GmPLDε1	611	597	Wound-responsive
GmPLDε2	1445	1458	Estrogen response
GmPLDε2	1887	1900	Light responsive
GmPLDε2	1805	1817	Dehydration
GmPLDε2	1659	1671	Gibberellin-responsive
GmPLDε2	1509	1520	Abscisic acid responsive
GmPLDε2	1265	1276	Abscisic acid responsive
GmPLDε2	296	307	Anaerobic induction
GmPLDε2	1693	1704	Anaerobic induction
GmPLDε2	1797	1808	Auxin responsive
GmPLDε2	1207	1218	Drought-inducibility
GmPLDε2	144	155	Light responsive
GmPLDε2	195	206	Light responsive
GmPLDε2	1509	1520	Light responsive
GmPLDε2	1116	1127	Light responsive
GmPLDε2	1510	1520	Abscisic acid responsive
GmPLDε2	1933	1943	Abscisic acid responsive
GmPLDε2	1858	1868	MeJA-responsive
GmPLDε2	1936	1946	MeJA-responsive
GmPLDε2	1858	1868	Salicylic acid responsive
GmPLDε2	1936	1946	Salicylic acid responsive
GmPLDε2	1265	1255	Abscisic acid responsive
GmPLDε2	1858	1848	MeJA-responsive
GmPLDε2	1936	1926	MeJA-responsive
GmPLDε2	1265	1254	Abscisic acid responsive
GmPLDε2	1509	1498	Abscisic acid responsive
GmPLDε2	1086	1075	Anaerobic induction
GmPLDε2	1038	1027	Light responsive
GmPLDε2	1096	1085	Light responsive
GmPLDε2	1265	1254	Light responsive
GmPLDε2	1932	1921	Light responsive
GmPLDε2	467	456	Light responsive
GmPLDε2	1920	1908	Gibberellin-responsive
GmPLDε2	490	477	Light responsive
GmPLDε2	1508	1495	Light responsive
GmPLDε2	1304	1290	Circadian control
GmPLDε2	732	718	Zein metabolism regulation
GmPLDε2	809	795	Zein metabolism regulation
GmPLDε3	838	853	Light responsive
GmPLDε3	605	619	Light responsive
GmPLDε3	1155	1169	Wound-responsive
GmPLDε3	922	935	Estrogen response
GmPLDε3	964	977	Estrogen response
GmPLDε3	1099	1112	Estrogen response
GmPLDε3	1224	1237	Estrogen response
GmPLDε3	1189	1202	Light responsive
GmPLDε3	1271	1283	Auxin responsive
GmPLDε3	1437	1449	Endosperm expression
GmPLDε3	1265	1277	Gibberellin-responsive
GmPLDε3	1585	1596	Anaerobic induction
GmPLDε3	68	79	Defense and stress responsive
GmPLDε3	643	654	Drought-inducibility
GmPLDε3	944	955	Light responsive
GmPLDε3	1095	1084	Light responsive
GmPLDε3	1111	1100	Light responsive
GmPLDε3	1214	1203	Light responsive
GmPLDε3	1261	1250	Light responsive
GmPLDε3	1141	1130	Meristem expression
GmPLDε3	432	420	Endosperm expression
GmPLDε3	1260	1248	Light responsive
GmPLDε3	473	459	Defense and stress responsive
GmPLDε3	653	639	Defense and stress responsive
GmPLDε3	948	934	Salicylic acid responsive
GmPLDε3	910	895	Defense and stress responsive
GmPLDε3	1489	1474	Elicitor-mediated activation
GmPLDε3	603	588	Light responsive
GmPLDζ1	491	505	Circadian control
GmPLDζ1	1883	1897	Defense and stress responsive
GmPLDζ1	1899	1913	Salicylic acid responsive
GmPLDζ1	474	488	Zein metabolism regulation
GmPLDζ1	212	225	Estrogen response
GmPLDζ1	130	142	Auxin responsive
GmPLDζ1	972	983	Anaerobic induction
GmPLDζ1	1662	1673	Anaerobic induction
GmPLDζ1	1755	1766	Light responsive
GmPLDζ1	127	137	Defense and stress responsive
GmPLDζ1	647	657	Defense and stress responsive
GmPLDζ1	1394	1404	MeJA-responsive
GmPLDζ1	1394	1384	MeJA-responsive
GmPLDζ1	1394	1384	Salicylic acid responsive
GmPLDζ1	315	304	Anaerobic induction
GmPLDζ1	1410	1399	Light responsive
GmPLDζ1	803	792	Meristem expression
GmPLDζ1	40	28	Gibberellin-responsive
GmPLDζ1	263	251	Light responsive
GmPLDζ1	388	376	Light responsive
GmPLDζ1	1690	1677	Light responsive
GmPLDζ1	466	452	Salicylic acid responsive
GmPLDζ1	469	455	Salicylic acid responsive
GmPLDζ1	284	270	Salicylic acid responsive
GmPLDζ1	516	502	Wound-responsive
GmPLDζ2	1316	1332	Light responsive
GmPLDζ2	862	875	Estrogen response
GmPLDζ2	1511	1524	Light responsive
GmPLDζ2	842	854	Light responsive
GmPLDζ2	770	781	Anaerobic induction
GmPLDζ2	621	632	Light responsive
GmPLDζ2	314	325	Light responsive
GmPLDζ2	568	557	Defense and stress responsive
GmPLDζ2	1078	1067	Defense and stress responsive
GmPLDζ2	1668	1657	Light responsive
GmPLDζ2	1724	1713	Light responsive
GmPLDζ2	1771	1760	Light responsive
GmPLDζ2	1374	1363	Light responsive
GmPLDζ2	37	24	Estrogen response
GmPLDζ2	678	664	Salicylic acid responsive
GmPLDζ2	1615	1597	Light responsive
GmPLDζ3	1462	1478	Light responsive
GmPLDζ3	452	466	Circadian control
GmPLDζ3	1587	1601	Salicylic acid responsive
GmPLDζ3	658	672	Wound-responsive
GmPLDζ3	792	805	Estrogen response
GmPLDζ3	1913	1926	Estrogen response
GmPLDζ3	1095	1107	Gibberellin-responsive
GmPLDζ3	254	265	Drought-inducibility
GmPLDζ3	401	412	Light responsive
GmPLDζ3	576	587	Light responsive
GmPLDζ3	356	367	Light responsive
GmPLDζ3	576	566	Abscisic acid responsive
GmPLDζ3	1380	1370	Defense and stress responsive
GmPLDζ3	705	694	Anaerobic induction
GmPLDζ3	1049	1038	Anaerobic induction
GmPLDζ3	1124	1113	Anaerobic induction
GmPLDζ3	319	308	Defense and stress responsive
GmPLDζ3	1470	1459	Light responsive
GmPLDζ3	1901	1889	Abscisic acid responsive
GmPLDζ3	966	954	Light responsive
GmPLDζ3	150	137	Estrogen response
GmPLDζ3	1627	1614	Estrogen response
GmPLDζ3	471	457	Salicylic acid responsive
GmPLDζ3	888	873	Light responsive
GmPLDζ3	786	771	Light responsive
GmPLDφ1	1538	1552	Elicitor-mediated activation
GmPLDφ1	1860	1873	Estrogen response
GmPLDφ1	826	838	Dehydration
GmPLDφ1	889	901	Endosperm expression
GmPLDφ1	547	558	Abscisic acid responsive
GmPLDφ1	799	810	Abscisic acid responsive
GmPLDφ1	1587	1598	Abscisic acid responsive
GmPLDφ1	1759	1770	Anaerobic induction
GmPLDφ1	233	244	Light responsive
GmPLDφ1	547	558	Light responsive
GmPLDφ1	799	810	Light responsive
GmPLDφ1	547	558	Light responsive
GmPLDφ1	799	810	Light responsive
GmPLDφ1	1587	1598	Light responsive
GmPLDφ1	548	558	Abscisic acid responsive
GmPLDφ1	800	810	Abscisic acid responsive
GmPLDφ1	1588	1598	Abscisic acid responsive
GmPLDφ1	1784	1794	Abscisic acid responsive
GmPLDφ1	1587	1576	Abscisic acid responsive
GmPLDφ1	991	980	Defense and stress responsive
GmPLDφ1	975	964	Drought-inducibility
GmPLDφ1	1451	1440	Light responsive
GmPLDφ1	1783	1772	Light responsive
GmPLDφ1	871	860	Light responsive
GmPLDφ1	1281	1270	Light responsive
GmPLDφ1	1096	1084	Light responsive
GmPLDφ1	1349	1336	Estrogen response
GmPLDφ1	1480	1467	Estrogen response
GmPLDφ1	1536	1523	Estrogen response
GmPLDφ1	1983	1969	Defense and stress responsive
GmPLDφ2	1460	1474	Light responsive
GmPLDφ2	544	558	Zein metabolism regulation
GmPLDφ2	1808	1821	Estrogen response
GmPLDφ2	806	818	Dehydration
GmPLDφ2	866	878	Endosperm expression
GmPLDφ2	779	790	Abscisic acid responsive
GmPLDφ2	91	102	Drought-inducibility
GmPLDφ2	243	254	Light responsive
GmPLDφ2	523	534	Light responsive
GmPLDφ2	779	790	Light responsive
GmPLDφ2	1581	1592	Light responsive
GmPLDφ2	779	790	Light responsive
GmPLDφ2	780	790	Abscisic acid responsive
GmPLDφ2	99	109	MeJA-responsive
GmPLDφ2	99	109	Salicylic acid responsive
GmPLDφ2	523	513	Abscisic acid responsive
GmPLDφ2	1581	1571	Abscisic acid responsive
GmPLDφ2	398	388	Defense and stress responsive
GmPLDφ2	850	840	Defense and stress responsive
GmPLDφ2	99	89	MeJA-responsive
GmPLDφ2	934	923	Drought-inducibility
GmPLDφ2	1374	1363	Light responsive
GmPLDφ2	1378	1367	Light responsive
GmPLDφ2	951	940	Light responsive
GmPLDφ2	1970	1959	Light responsive
GmPLDφ2	1213	1202	Light responsive
GmPLDφ2	925	914	Meristem expression
GmPLDφ2	1055	1043	Light responsive
GmPLDφ2	1407	1394	Estrogen response
GmPLDφ2	1752	1739	Estrogen response
GmPLDφ2	532	519	Light responsive
GmPLDφ2	1758	1744	Defense and stress responsive
GmPLDφ2	530	516	Light responsive

## Sheet: S8
Table S8 Tissue expression patterns of the GmPLD genes.
Gene name	Gene ID	cotyledon-1	cotyledon-2	stem-1	stem-2	leafbud-1	leafbud-2	leafbud-3	leaf-1	leaf-2	leaf-3	flower-1	flower-2	flower-3	flower-4	flower-5	pod & seed-1	pod & seed-2	pod & seed-3	pod-1	pod-2	pod-3	seed-1	seed-2	seed-3	seed-4	seed-5	axillary_bud	root
GmPLDα1	Glyma.08G211700	17.9505	17.7459	71.329	64.8457	49.2713	38.2563	64.8497	9.80144	21.4575	7.49127	55.8156	78.8886	55.7538	75.9596	51.1862	57.1459	58.0736	53.0828	73.4994	109.775	64.747	48.5755	54.6318	18.2168	23.7559	16.88	66.314	80.1668
GmPLDα2	Glyma.07G031100	6.14628	7.64794	24.0078	24.8264	17.6418	13.8235	26.6513	1.67559	4.97639	14.0728	20.1971	25.4349	19.8419	24.6167	14.0186	20.1764	17.9798	14.6632	26.0487	27.9259	13.68	22.9207	16.7545	6.97371	6.62538	3.53515	29.0457	30.3191
GmPLDα3	Glyma.13G364900	20.0643	46.8444	47.991	31.7322	10.8506	18.1285	38.1002	9.65475	26.0209	25.86	34.1575	35.4014	41.1119	36.4316	37.1767	25.4902	32.9148	28.2219	38.0539	49.4885	41.8673	10.4419	5.72963	3.03043	3.38036	0.939806	52.876	46.1853
GmPLDα4	Glyma.06G068600	0.261832	0	1.34395	4.77898	0.239551	0.179799	0.515549	0.493985	2.10577	0.0604761	0.817047	4.03162	1.85376	1.43168	0.452243	0.719674	1.04113	2.19132	1.16275	2.46379	1.5726	0.317915	0.0834884	0.123128	0.0556079	0	0.773137	5.91426
GmPLDα5	Glyma.06G068700	0.300666	0.0648281	1.09527	2.48931	0.305232	0.593484	0.849507	0.179804	0.998913	0	1.22174	2.83087	1.22304	1.54031	0.455322	0.547799	0.577508	0.887722	0.821261	0.918239	0.874976	0.446991	0.140325	0.0427864	0.0356726	0	0.579097	2.10666
GmPLDα6	Glyma.15G008500	0	0.127676	2.94368	7.20862	0	0.146172	0	0.368299	1.93113	0.112982	2.96168	0.295179	0.799239	0.522742	0.248371	0.676213	1.0257	2.06244	0.713087	1.80754	1.51032	0	0	0	0	0	0	2.9694
GmPLDβ1	Glyma.18G288600	1.87114	4.38253	2.47273	3.01529	1.13766	1.3368	3.01337	0.675578	1.66777	2.18223	3.00767	4.74052	4.93167	3.67904	3.05275	1.28068	1.02088	1.86137	1.90586	3.27908	4.75323	0.745985	0.689181	0.184608	0.545275	0.341714	2.7806	2.44427
GmPLDβ2	Glyma.02G093500	1.19954	4.87706	2.07248	3.72964	0.427579	0.764175	1.39301	0.836401	1.62997	3.15302	1.84981	2.94339	5.78202	3.71948	1.54971	0.734972	1.14719	2.3318	2.36603	3.11974	2.84099	1.34221	1.29108	0.370732	0.895611	0.255471	1.98113	2.12108
GmPLDβ3	Glyma.07G080400	16.6933	3.25822	6.04555	3.6104	7.18249	6.16304	9.08336	0.994512	3.25576	5.48645	8.98116	9.47094	3.40744	4.60408	4.68041	3.53314	3.53112	3.49255	4.75627	6.19459	3.79208	8.89117	6.18352	1.38732	2.06737	0.759799	8.42405	4.66471
GmPLDβ4	Glyma.03G018900	1.4899	0.871334	0.593968	0.886782	0.439512	0.559029	1.07286	0.424064	1.3024	2.00719	1.10143	1.37068	1.39336	1.43645	0.423128	0.822125	0.851434	0.374783	1.00441	0.600821	0.841925	0.12828	0.420869	0.139082	0.20391	0.0916533	0.89779	1.12491
GmPLDγ1	Glyma.01G215100	3.82654	14.1669	4.06415	0.274416	3.04286	2.9053	3.63168	2.44577	7.41861	9.66642	1.98592	2.56016	1.41141	2.66165	3.2781	2.05073	1.93353	1.19002	1.91953	1.55273	0.783026	0.760561	0.282802	0.270085	0.241277	0	2.27363	12.1373
GmPLDδ1	Glyma.11G081500	1.18541	1.49827	4.41597	6.04633	5.29788	6.08946	9.51952	1.2679	3.21322	0.214623	7.71575	6.23409	3.33424	5.01403	10.6191	11.6182	11.4544	10.9556	14.3786	18.7321	11.153	4.1545	6.37605	1.84045	4.56568	1.21841	7.51486	3.93007
GmPLDδ2	Glyma.01G162100	2.86789	5.20572	5.32083	12.4362	9.40038	9.94523	9.49979	2.77451	4.79963	5.32016	13.1941	9.13662	5.59034	6.98291	11.7774	11.733	12.2629	12.6597	13.7402	18.0147	14.3873	8.94039	7.45324	2.37571	3.20446	0.974149	9.94305	6.42495
GmPLDδ3	Glyma.05G168300	1.7348	0.603387	0.240859	0.657016	0.280927	1.30669	1.1069	0.75813	1.32391	3.02608	2.29284	3.21873	2.88747	1.41816	1.06352	0.310568	0.486861	0.437545	0.447069	0.453727	0.658071	0.438913	0.435954	0.185484	0.0957002	0.16053	0.953312	0.176585
GmPLDδ4	Glyma.06G020500	0.302518	0	1.71372	1.75763	0.919305	0.505286	2.09802	0.0787507	0.158786	0	2.0373	2.5499	1.62495	2.51245	3.30113	1.43758	1.14373	1.52383	1.1731	1.9086	0.680033	1.12306	0.583073	0.211301	0.0855594	0.0462031	1.86908	2.32545
GmPLDδ5	Glyma.04G020400	0.688319	0.0513254	2.80568	1.89998	1.98646	0.990084	2.0126	0.374282	0.342265	0.0864123	1.43284	2.80218	6.02382	5.48153	1.33568	0.127813	0.305605	0.162294	0.328559	0.344613	0.355435	0.270647	0.322072	0.148609	0.0940185	0	1.24736	2.08007
GmPLDδ6	Glyma.08G126700	0	0	0	0	0	0	0	0.534228	1.56134	0.282105	0.59488	1.11281	0	0	0	0	0	0	0	0	0	0	0	0	0	0	0	0
GmPLDε1	Glyma.07G010900	0.458646	0	1.3091	1.25529	0.890696	2.1943	1.83369	1.79191	1.66601	0	1.36594	2.96355	2.65772	0.829693	0.391181	0.428141	0.419671	0.382241	1.16036	0.844122	0.646095	0	0.0827342	0.0769621	0.160657	0	0.643029	3.64507
GmPLDε2	Glyma.15G023500	0.427659	0.0876596	0.523245	0.485385	0.961386	2.18149	1.04337	1.45303	0.903572	0	1.06361	3.03463	5.8991	0.959856	0.527162	0.335336	0.237976	0.449108	0.792632	0.578506	0.417158	0.370658	0.111078	0	0	0.0403582	0.764954	3.54826
GmPLDε3	Glyma.08G194100	0.756829	0	1.26206	0.783416	0.284701	0.642391	0.28546	0.862131	1.46788	0	0.917509	1.17628	0.297987	0.122548	0	0.452016	0.129284	0.255613	0.192259	0.812748	0.24796	0	0.110629	0	0.146563	0	0.523058	2.99634
GmPLDζ1	Glyma.20G238000	0.377362	12.6687	0.783208	5.86559	1.00049	11.8248	0.410478	38.4461	1.5234	12.8024	1.31354	1.38459	15.5123	11.982	0.544121	0.146994	0.398784	0.369917	17.0787	13.3089	9.06499	2.22969	1.6592	0	0.104871	0	0.663747	2.3032
GmPLDζ2	Glyma.15G152100	1.06176	2.88049	2.06092	1.52708	0.900867	1.19496	1.54	1.19239	1.46329	4.01657	2.81579	3.23622	4.25639	3.3486	2.0188	1.60213	1.65381	2.5876	2.82451	4.81758	4.4544	1.88861	1.30445	0.511428	0.711961	0.48019	1.3925	1.43652
GmPLDζ3	Glyma.09G041400	1.72213	4.42916	2.2167	2.68353	1.7342	2.16958	2.68906	1.59254	3.05025	5.82798	5.06111	5.45372	6.09932	5.9505	2.08269	1.56544	1.35181	2.2608	2.47211	3.38029	2.74779	2.44795	2.00121	0.482309	0.845895	0.72035	2.28055	3.26919
GmPLDφ1	Glyma.04G060900	0	1.55469	0.259179	0.145352	0	0.736954	0	0.578795	0.116086	0	0.657422	0.377752	0	0	0.531243	0.273888	0.376547	0.231979	0.446162	0.660202	0.414825	0.216892	0.320235	0.0708614	0.0589442	0	0	0.121958
GmPLDφ2	Glyma.06G061500	2.00366	1.68573	1.36517	1.15236	0.802987	0.834167	2.1249	0.325821	0.653508	0.386226	1.87317	1.24008	0.669914	0.784066	1.35428	1.16022	0.667712	0.947145	0.995894	1.62999	1.64006	1.37075	0.637104	0.373674	0.42576	0.10257	3.00547	1.16013
root, cotyledon-1, leafbud-1 and stem-1 at the 5-day emergence stage (VE5); cotyledon-2, leafbud-2, leaf-1 and stem-2 at the cotyledon stage (VC); leafbud-3, leaf-2, flower-1, and axillary_bud at the three-node stage (V3); leaf-3 at the tenth week of the growth period; flower-2 represents the flowers before anthesis, flower-3 represents the flowers on day 0 of anthesis, flower-4 represents the fl…

## Sheet: S9
Table S9 Expression analyses of GmPLD genes under normal and low phosphorus conditions.
Gene Name	Gene ID	NP-Leaf1	NP-Leaf2	NP-Leaf3	LP-Leaf1	LP-Leaf2	LP-Leaf3	NP-Root1	NP-Root2	NP-Root3	LP-Root1	LP-Root2	LP-Root3
GmPLDα1	Glyma.08g211700	23.76	34.79	18.246	20.573	32.77	18.74	52.29	55.064	60.02	51.422	49.511	46.974
GmPLDα2	Glyma.07g031100	4.287	9.335	3.094	1.333	6.421	2.901	20.9	26.531	27.346	22.979	22.779	21.857
GmPLDα3	Glyma.13g364900	10.685	12.524	8.641	5.654	10.073	5.057	127.464	152.693	132.204	159.82	104.78	151.789
GmPLDα4	Glyma.06g068600	3.018	1.549	2.387	2.012	2.431	2.511	1.342	1.173	0.752	2.903	0.555	1.63
GmPLDα5	Glyma.06g068700	0.834	0.659	1.023	1.019	0.924	1.092	0.417	0.269	0.261	0.476	0	0.868
GmPLDα6	Glyma.15g008500	0.136	0.272	0.09	0	0.297	0	3.585	4.888	4.261	5.826	1.664	3.014
GmPLDβ1	Glyma.18g288600	2.032	1.433	1.176	0.644	1.129	0.799	0.959	1.436	1.098	3.867	1.67	3.445
GmPLDβ2	Glyma.02g093500	0.52	0.333	0.411	0.197	0.242	0.235	1.502	1.596	1.347	4.633	2.545	4.849
GmPLDβ3	Glyma.07g080400	19.556	21.302	19.183	14.405	18.215	19.824	3.594	5.737	3.961	11.071	6.522	8.792
GmPLDβ4	Glyma.03g018900	19.067	13.52	10.585	9.309	9.503	5.84	2.238	2.488	1.848	5.758	2.925	5.118
GmPLDγ1	Glyma.01g215100	6.45	4.804	4.543	2.243	2.42	1.149	6.342	7.664	6.3	17.008	5.852	12.237
GmPLDδ1	Glyma.11g081500	5.208	8.503	4.182	3.767	6.645	4.742	4.757	4.692	6.181	2.875	2.438	2.744
GmPLDδ2	Glyma.01g162100	5.725	9.258	4.831	3.675	5.162	4.827	4.985	5.687	5.198	8.535	4.66	6.435
GmPLDδ3	Glyma.05g168300	2.179	1.211	1.708	2.871	1.685	2.642	0.307	0.487	0.272	0.213	0.291	0.338
GmPLDδ4	Glyma.06g020500	0.237	0.213	0.188	0.252	0.262	0.164	1.067	1.087	1.172	1.756	0.744	0.856
GmPLDδ5	Glyma.04g020400	0.158	0.814	0.417	0.467	0.212	0.212	0.437	0.271	0.265	0.465	0.306	0.462
GmPLDδ6	Glyma.08g126700	1.341	0.55	0.874	1.538	1.01	0.545	0	0	0	0	0	0
GmPLDε1	Glyma.07g010900	0.204	0.553	0.277	0.31	0.645	0.235	0	0	0	0.161	0	0.028
GmPLDε2	Glyma.15g023500	0	0.029	0	0	0	0	0	0	0	0.033	0	0
GmPLDε3	Glyma.08g194100	0	0.054	0	0	0	0	0.019	0.05	0.027	0.119	0	0
GmPLDζ1	Glyma.20g238000	0.938	0.748	0.841	0.296	0.377	0.216	0.159	0.468	0.21	1.381	0.702	0.914
GmPLDζ2	Glyma.15g152100	2.357	2.286	1.215	1.566	1.987	1.647	0.887	1.337	1.483	2.578	1.124	1.804
GmPLDζ3	Glyma.09g041400	2.52	1.896	1.146	1.016	1.531	1.442	1.231	1.946	1.383	3.432	1.385	2.853
GmPLDφ1	Glyma.04g060900	0.528	0.489	0.269	0	0.227	0.043	0.104	0.141	0.038	0	0	0
GmPLDφ2	Glyma.06g061500	0.582	0.704	0.493	0	0.584	0.287	1.235	1.359	0.962	3.027	1.255	2.105
NP, normal phosphorus supply (500 μM, Pi); LP, low phosphorus supply (5 μM, Pi).

## Sheet: S10
Table S10 Expression of GmPLD genes in drought 10% and control and drought 8% and control.
Gene name	Gene ID	CK10-1	CK10-2	CK10-3	D10-1	D10-2	D10-3	CK8-1	CK8-2	CK8-3	D8-1	D8-2	D8-3
GmPLDα1	Glyma.08g211700	32.9639	44.72	39.135	48.6702	33.4638	34.5488	77.9398	74.234	64.5389	120.09	96.4806	103.969
GmPLDα2	Glyma.07g031100	11.9042	16.6751	13.3823	18.4488	13.2067	13.9874	38.0299	37.7952	34.7996	60.2709	46.4457	53.8074
GmPLDα3	Glyma.13g364900	74.9518	79.6025	66.8779	96.1499	89.6738	81.9045	74.4464	112.981	113.223	159.09	117.979	151.467
GmPLDα4	Glyma.06g068600	1.85118	2.94956	2.91977	3.88407	2.20546	1.83659	1.61679	2.01694	1.89555	1.96093	1.72696	1.21644
GmPLDα5	Glyma.06g068700	0.873739	1.23558	1.07332	1.55019	1.12741	0.680772	0.764376	0.725399	0.535826	0.940727	0.863105	0.594348
GmPLDα6	Glyma.15g008500	9.77564	29.0386	18.1256	36.8154	13.2886	15.7068	7.28036	7.6589	9.55379	11.8586	7.99287	15.0452
GmPLDβ1	Glyma.18g288600	3.28859	4.60387	4.1138	5.86588	3.78422	4.13727	7.48083	4.8865	4.74147	6.85536	10.5512	7.03329
GmPLDβ2	Glyma.02g093500	2.44615	2.99812	2.29737	3.00263	2.4388	2.63452	3.72205	3.10698	2.93751	4.91058	7.30983	5.63708
GmPLDβ3	Glyma.07g080400	6.24612	7.34685	5.8118	5.7724	4.71929	5.42739	27.6649	23.303	16.9788	24.0379	29.215	23.5362
GmPLDβ4	Glyma.03g018900	0.026523	0.163936	0.217657	0.095585	0.137764	0.314386	0.010736	0	0.045372	0.05853	0.090829	0.045612
GmPLDγ1	Glyma.01g215100	14.6321	13.219	13.7176	11.7244	14.731	14.1781	18.8039	18.3284	18.2782	13.0553	15.7077	15.2186
GmPLDδ1	Glyma.11g081500	8.9533	11.0655	10.2263	12.2454	8.11814	7.70346	9.99787	9.47305	8.94607	9.97785	7.70969	8.36424
GmPLDδ2	Glyma.01g162100	17.7467	25.5638	21.2643	26.0232	19.9066	18.455	17.0343	17.2628	16.4851	17.4476	13.2592	16.4789
GmPLDδ3	Glyma.05g168300	3.78254	3.35208	3.06549	3.18463	3.77016	3.85417	3.01622	2.99202	2.01735	3.23517	4.32562	4.09815
GmPLDδ4	Glyma.06g020500	1.15375	1.03827	1.11282	1.67657	1.25663	1.04407	1.42077	1.35591	0.900942	1.69824	1.17081	1.84893
GmPLDδ5	Glyma.04g020400	1.00974	1.10113	1.28574	1.15492	1.35624	1.25344	0.627281	0.950408	0.897986	0.781977	0.587172	0.989709
GmPLDδ6	Glyma.08g126700	4.42569	3.73687	3.69832	3.02961	3.48007	3.47555	0.763829	0.732319	0.427095	0.96579	0.899664	0.558829
GmPLDε1	Glyma.07g010900	3.71983	3.74324	4.81498	5.36648	3.16573	3.29643	2.57265	2.30113	3.23271	3.38963	3.74032	3.65912
GmPLDε2	Glyma.15g023500	1.33947	1.82642	1.86509	2.04222	1.33093	1.51297	0.717445	0.847009	0.922701	0.796965	0.900297	0.907598
GmPLDε3	Glyma.08g194100	1.73784	3.11088	2.94498	5.21773	2.22273	2.28158	1.78902	1.82567	2.2155	2.44059	2.71247	2.57537
GmPLDζ1	Glyma.20g238000	1.91221	2.17053	1.8381	1.21241	1.15739	1.23	2.68349	3.81776	2.21912	2.46746	2.0723	3.12949
GmPLDζ2	Glyma.15g152100	5.71731	5.943	4.91986	6.31529	6.15792	5.79534	4.83092	5.24857	4.5267	6.16363	4.50303	5.92409
GmPLDζ3	Glyma.09g041400	5.81518	5.26588	5.29784	5.61951	5.80637	5.36506	5.43389	5.13218	4.37082	5.78819	4.19562	6.38508
GmPLDφ1	Glyma.04g060900	0.223887	0.374549	0.505701	0.49354	0.176403	0.241829	1.17639	0.98385	0.6228	0.509589	0.328739	0.717882
GmPLDφ2	Glyma.06g061500	1.60966	1.87443	2.04208	2.31704	1.6738	1.94401	3.08635	2.2762	2.74248	4.19773	3.99058	2.77323
D10: Sampling from drought treatment at 10% soil moisture content. D8: Sampling from drought treatment at 8% soil moisture content. CK10: This group serves as the control for drought treatment with a soil moisture content of 10%, without any drought intervention. CK8: This group functions as the control for drought treatment with a soil moisture content of 8%, also without any drought interventio…

[truncated: 1 more sheets: S11]
